# Supplementary material for: Isolation of large dense-core vesicles from bovine adrenal medulla for functional studies
Source: PubMed Central journal article supplement (PMC7200684; doi:10.1038/s41598-020-64486-3), 2020-05-05

# **Isolation of large dense-core vesicles from bovine adrenal medulla for functional studies**

Yelda Birinci<sup>1</sup>, Julia Preobraschenski<sup>2</sup>, Marcelo Ganzella<sup>2</sup>, Reinhard Jahn<sup>2,\*</sup>, and Yongsoo Park<sup>1,3\*</sup>.

Full-length gels\_\_Fig3a\_SDHA

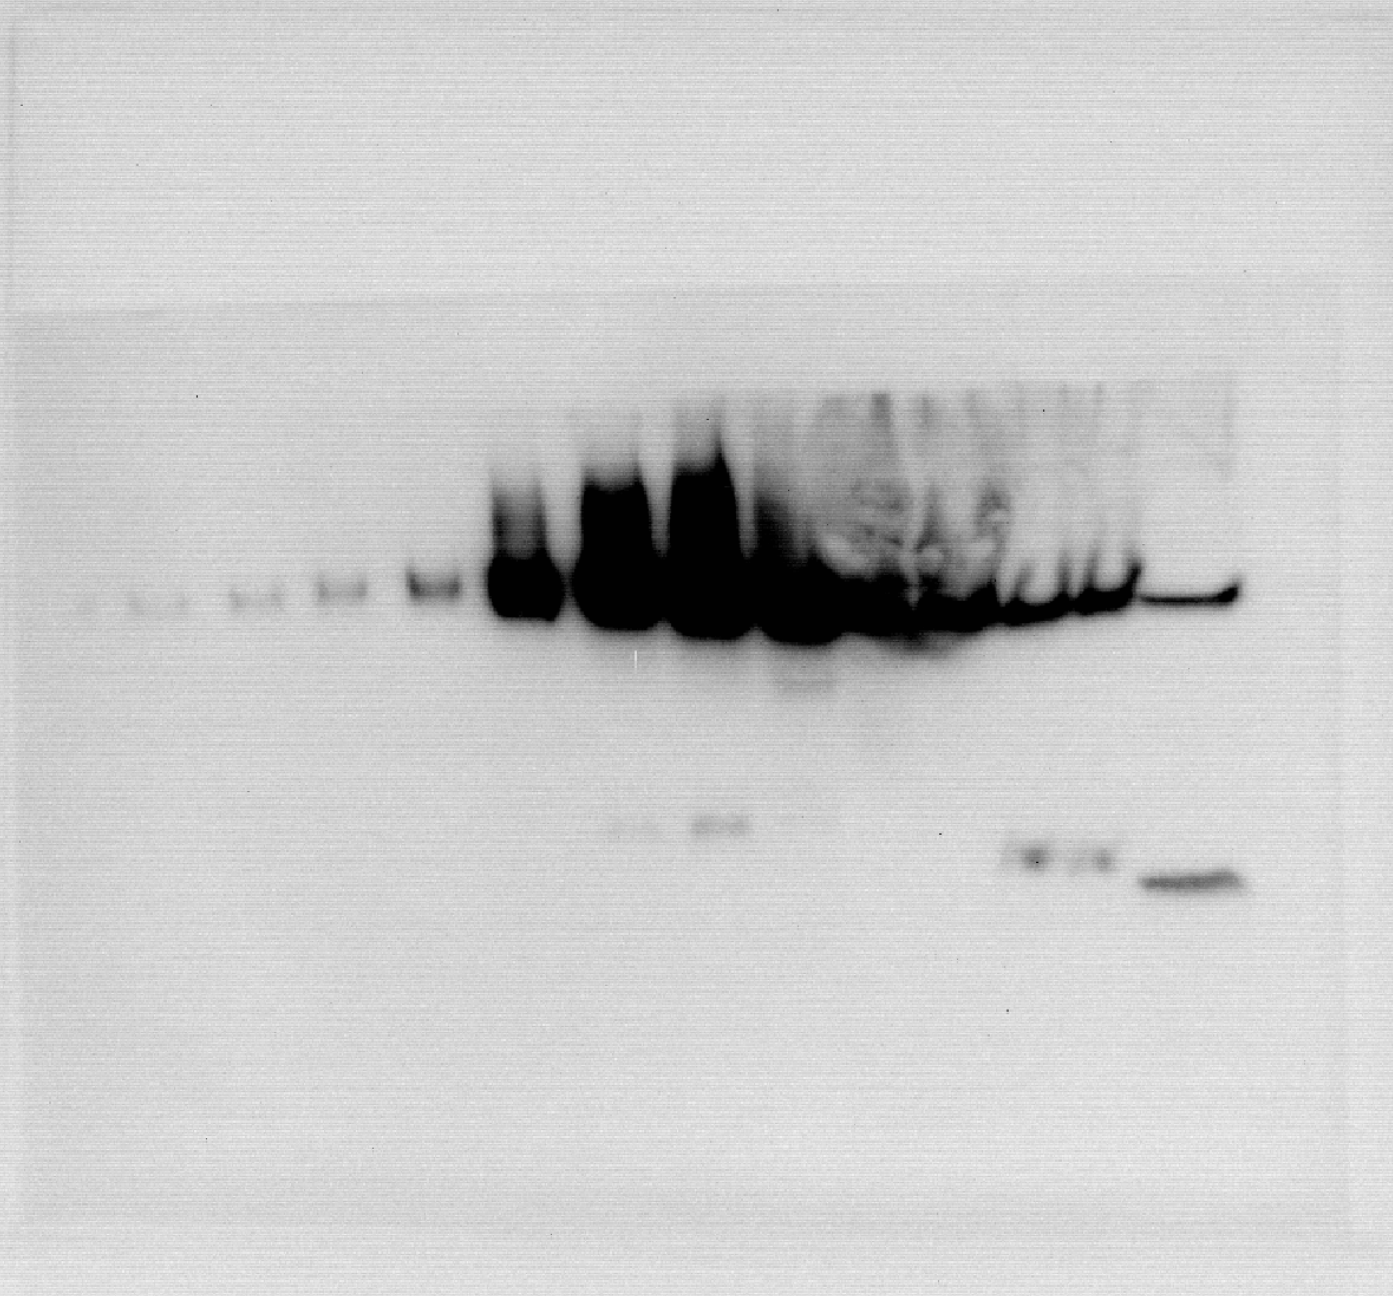

Full-length gels\_\_Fig3a\_VAMP2

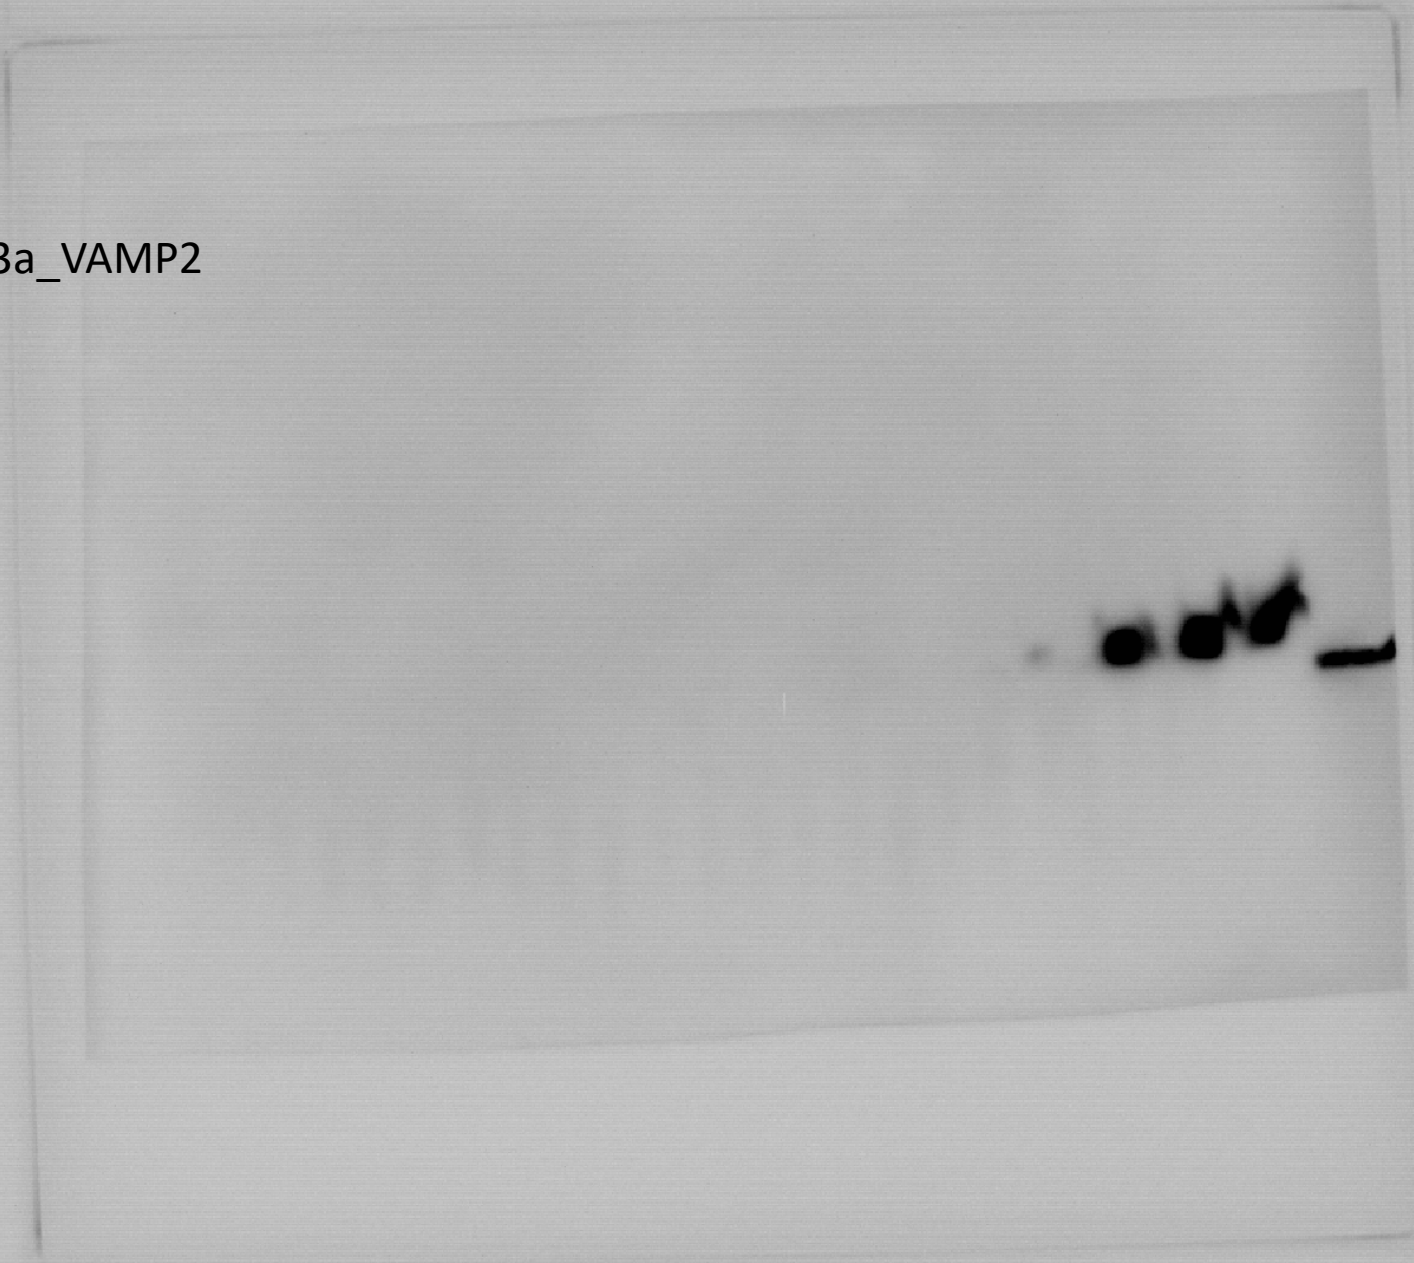

Full-length gels\_\_Fig3b\_SDHA

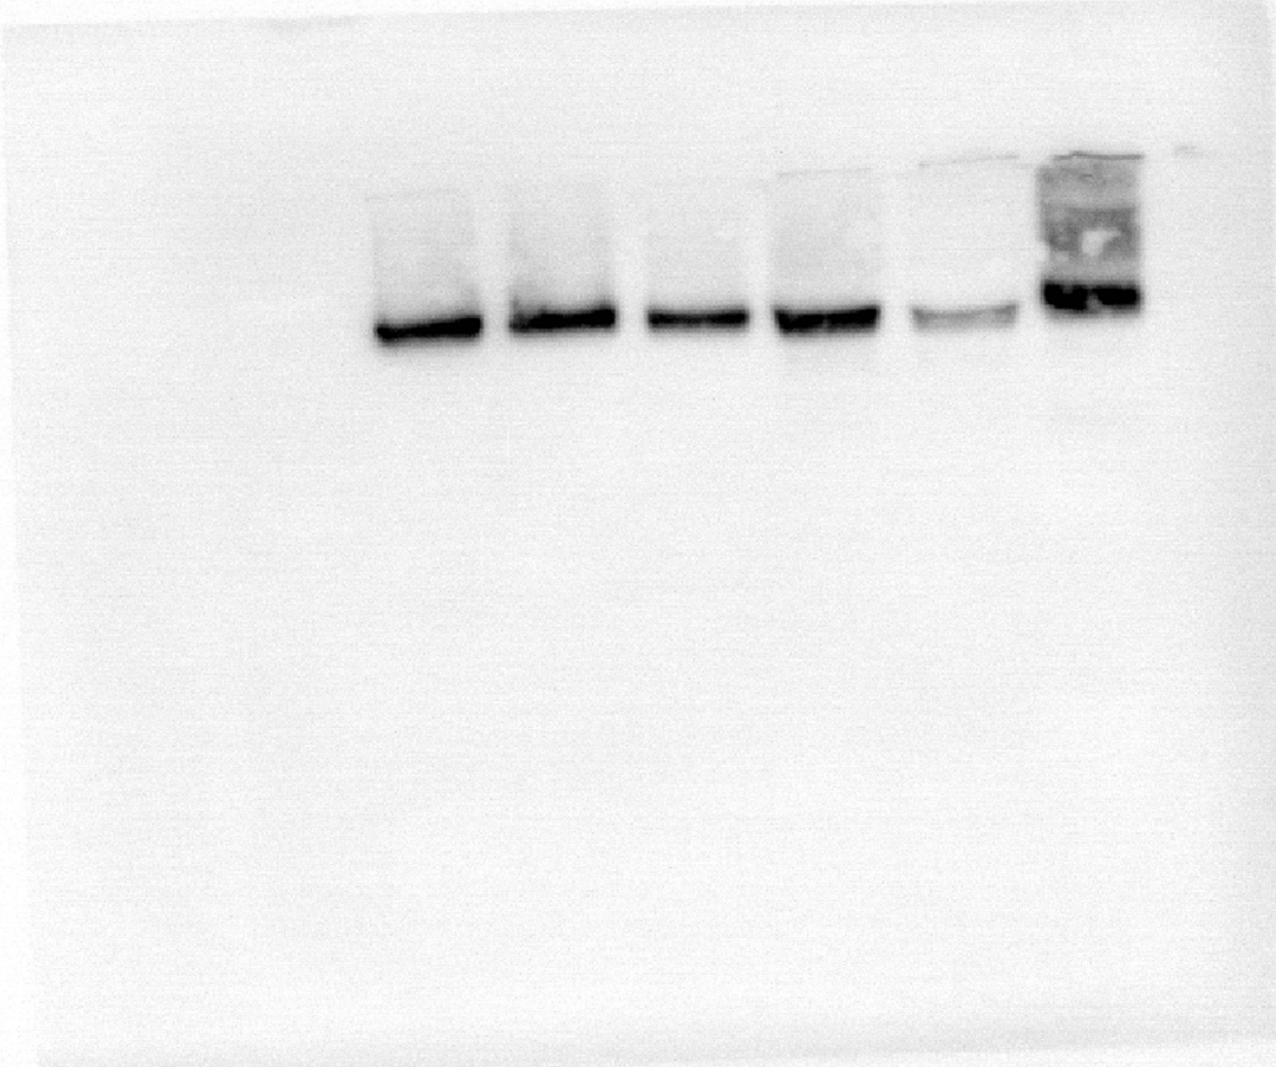



Full-length gels\_\_Fig3b\_VAMP2

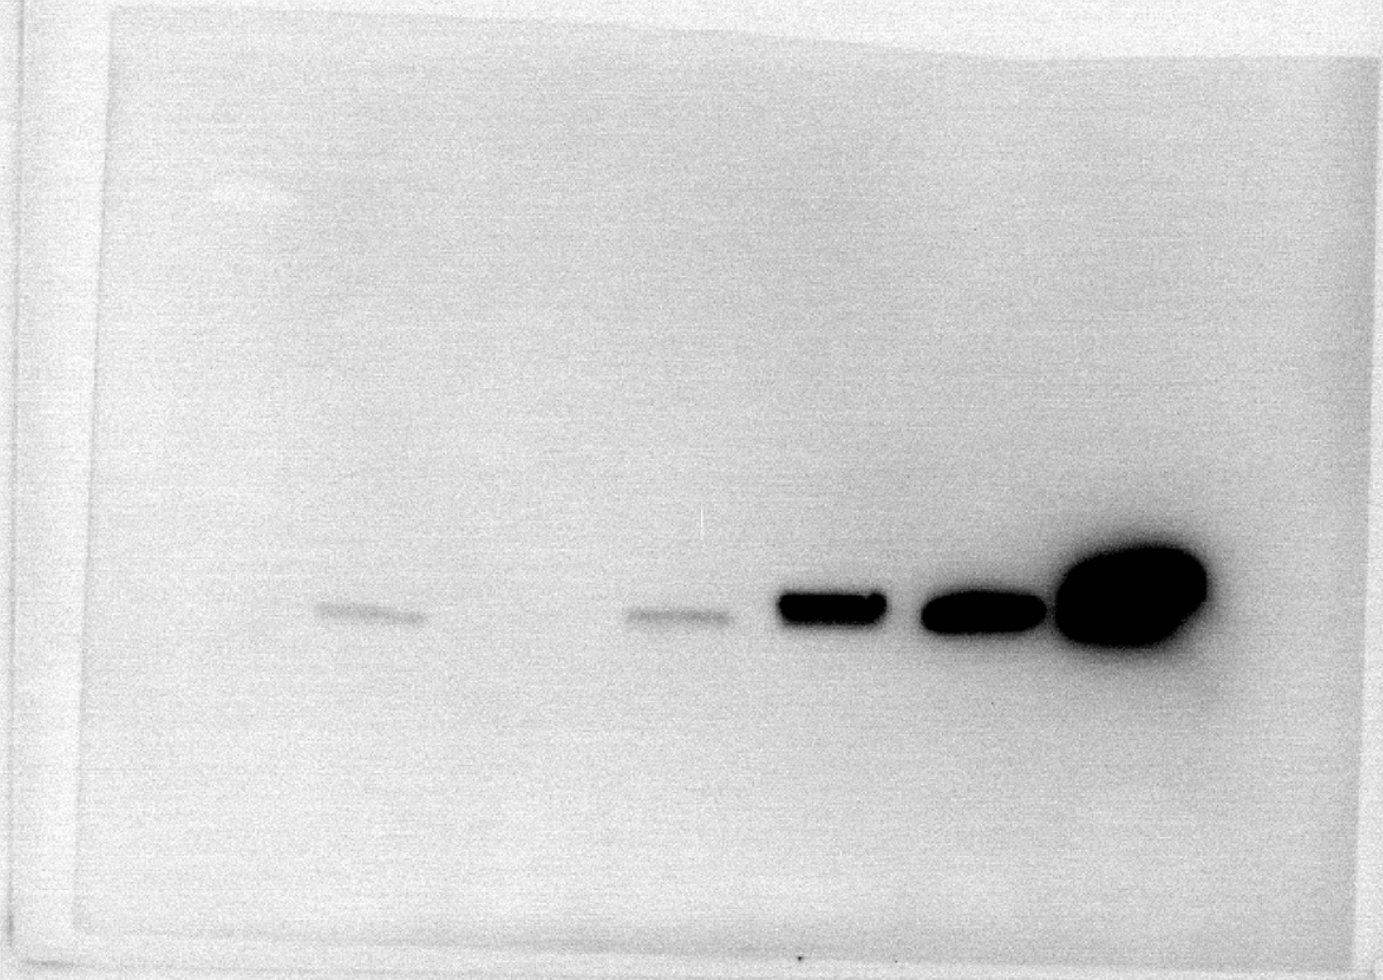

Full-length gels\_\_Fig3c\_DBH

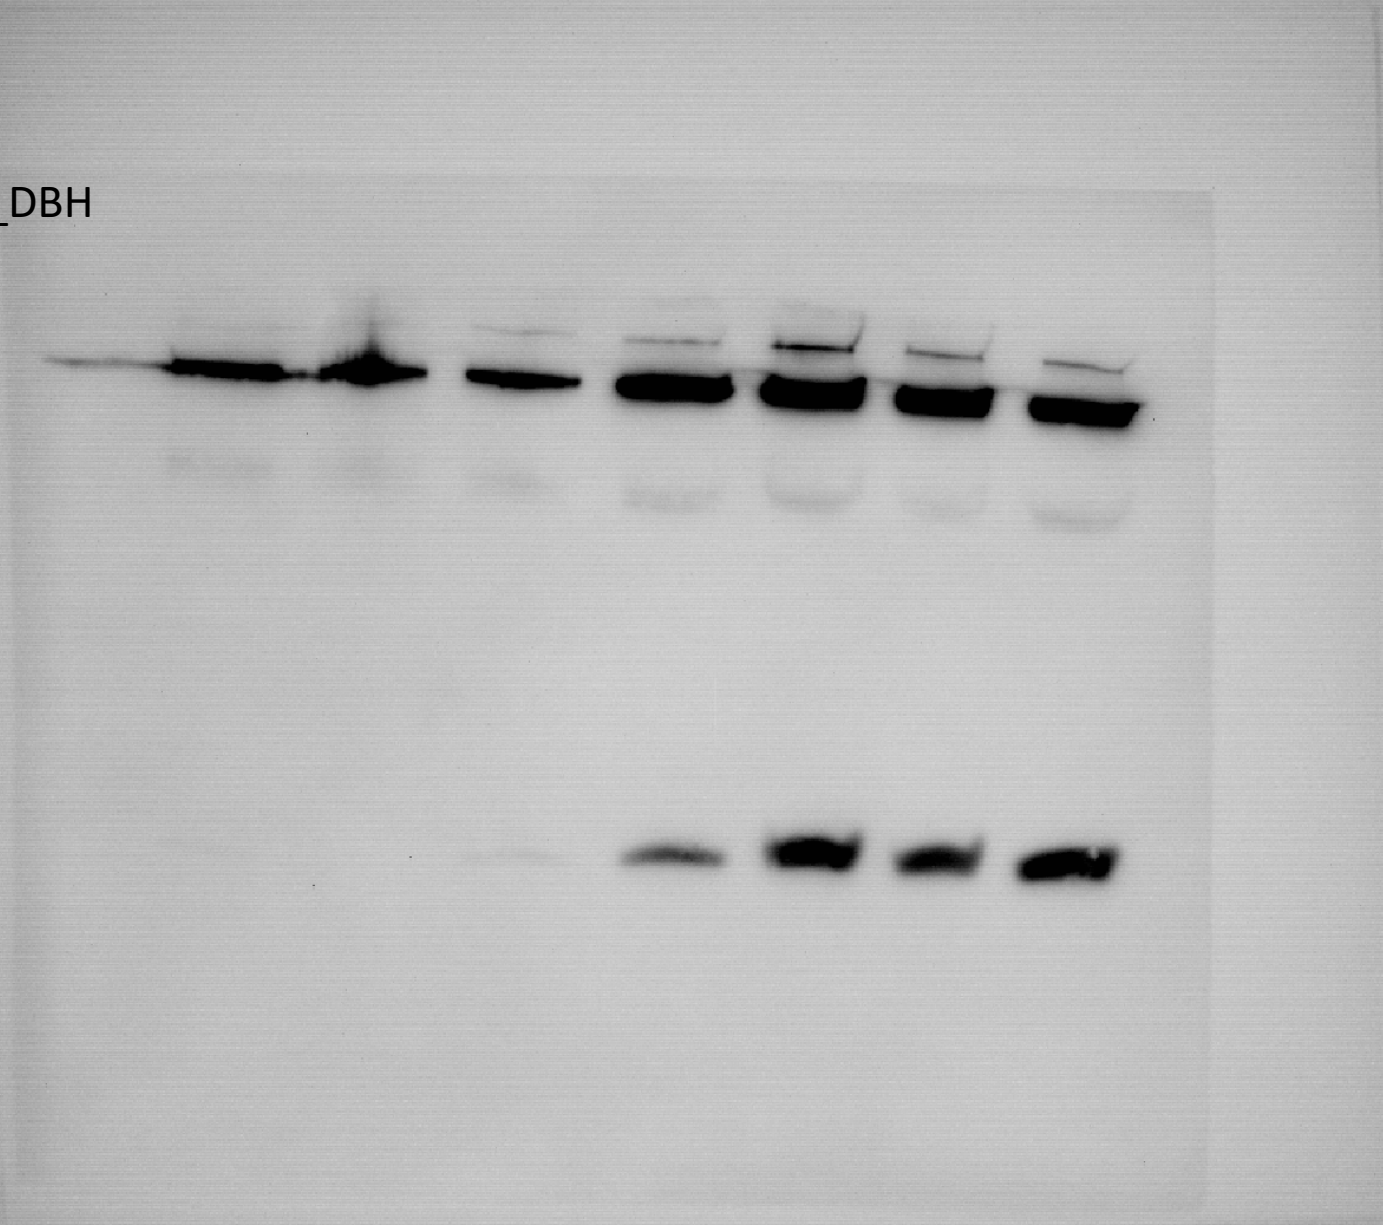

Full-length gels\_\_Fig3c\_SDHA

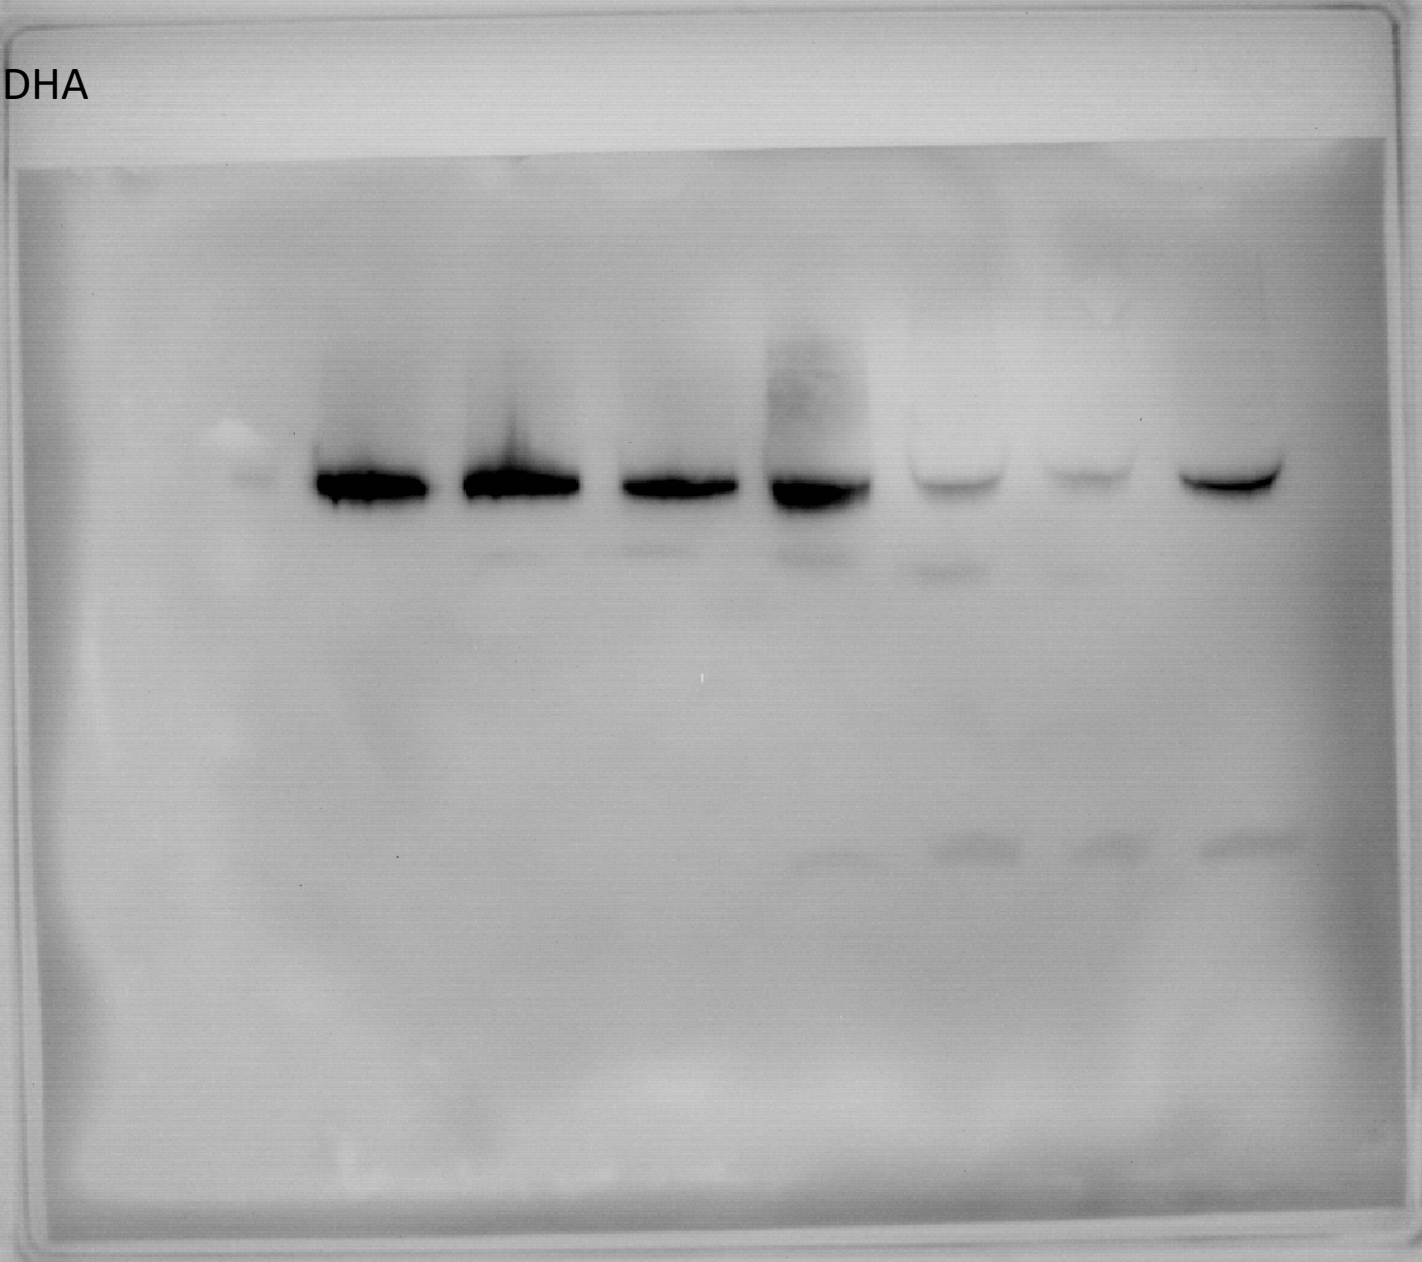



Full-length gels\_\_Fig3c\_VAMP2

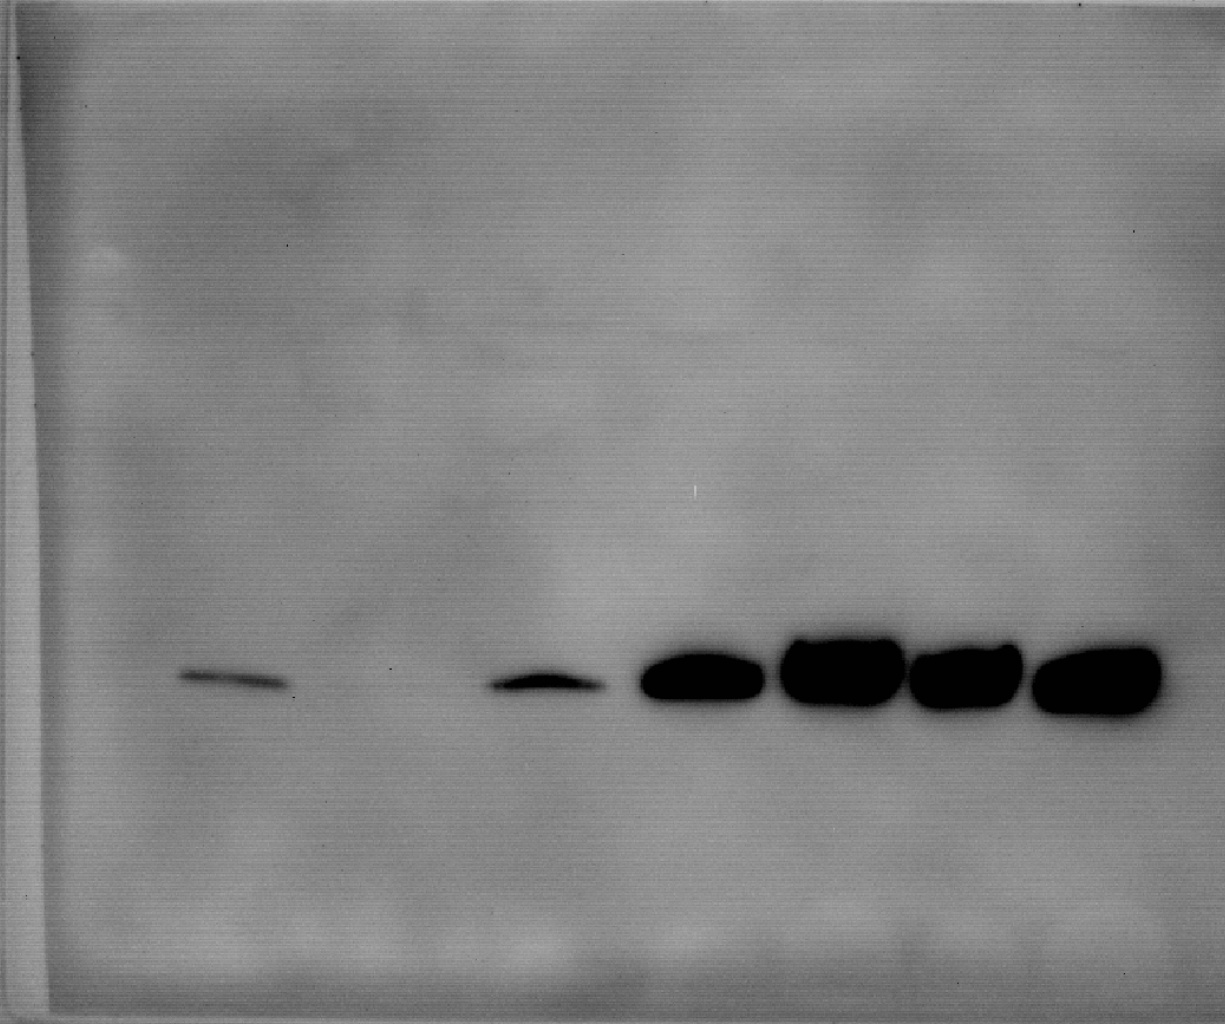

Supplement: 41598_2020_64486_MOESM1_ESM.pdf [file 41598_2020_64486_MOESM1_ESM.pdf]
